# Supplementary material
Source: HighWire-hosted journal article supplement (https://bmjopen.bmj.com/content/14/8/e083592)
Supplement: inline-supplementary-material-1 [file inline-supplementary-material-1.pdf]

## SPIRIT checklist

| Section / item                                               | Item |                                                                                                                                                                                                                     | Page     |
|--------------------------------------------------------------|------|---------------------------------------------------------------------------------------------------------------------------------------------------------------------------------------------------------------------|----------|
| Administrative information                                   |      |                                                                                                                                                                                                                     |          |
| Title                                                        | 1    |                                                                                                                                                                                                                     | 1        |
| Trial registration                                           | 2a   | Trial identifier and registry name.                                                                                                                                                                                 | 2, 18    |
|                                                              | 2b   | All items from the World Health Organization Trial Registration Data Set                                                                                                                                            | 18       |
| Protocol version                                             | 3    |                                                                                                                                                                                                                     | 1        |
| Funding                                                      | 4    |                                                                                                                                                                                                                     | 18       |
| Roles and responsibilities                                   | 5a   | Names, affiliations, and roles of protocol contributors                                                                                                                                                             | 1, 18    |
|                                                              | 5b   | Name and contact information for the trial sponsor                                                                                                                                                                  | NA       |
|                                                              | 5c   | Role of study sponsor and funders, if any, in study design                                                                                                                                                          | NA       |
|                                                              | 5d   | Composition, roles, and responsibilities of the coordinating centre, steering committee, endpoint adjudication committee, data management team, and other individuals or groups overseeing the trial, if applicable | 7-9      |
| Introduction                                                 |      |                                                                                                                                                                                                                     |          |
| Background and rationale                                     | 6a   | Description of research question and justification for undertaking the trial, including summary of relevant studies (published and unpublished) examining benefits and harms for each intervention                  | 4, 5     |
|                                                              | 6b   | Explanation for choice of comparators                                                                                                                                                                               |          |
| Objectives                                                   | 7    |                                                                                                                                                                                                                     | 5        |
| Trial design                                                 | 8    |                                                                                                                                                                                                                     | 1,2, 4-6 |
| Methods: Participants, interventions, and outcomes           |      |                                                                                                                                                                                                                     |          |
| Study setting                                                | 9    |                                                                                                                                                                                                                     | 6        |
| Eligibility criteria                                         | 10   |                                                                                                                                                                                                                     | 6        |
| Interventions                                                | 11a  | Interventions for each group                                                                                                                                                                                        | 6,7      |
|                                                              | 11b  | Criteria for discontinuing or modifying allocated interventions for a given trial participant                                                                                                                       | 10,11    |
|                                                              | 11c  | Strategies to improve adherence to intervention protocols, and any procedures for monitoring adherence                                                                                                              | 8        |
|                                                              | 11d  | Relevant concomitant care and interventions that are permitted or prohibited during the trial                                                                                                                       | 6, 7     |
| Outcomes                                                     | 12   |                                                                                                                                                                                                                     | 9-14     |
| Participant timeline                                         | 13   |                                                                                                                                                                                                                     | 6-8      |
| Sample size                                                  | 14   |                                                                                                                                                                                                                     | 15       |
| Recruitment                                                  | 15   |                                                                                                                                                                                                                     | 6        |
| Methods: Assignment of interventions (for controlled trials) |      |                                                                                                                                                                                                                     |          |
| Sequence generation                                          | 16a  | Method of generating the allocation sequence, and list of any factors for stratification.                                                                                                                           | 7-8      |
| Allocation concealment mechanism                             | 16b  | Mechanism of implementing the allocation sequence                                                                                                                                                                   | 7-8      |
| Implementation                                               | 16c  | Who will generate the allocation sequence, who will enrol participants, and who will assign participants to interventions                                                                                           | 7, 17    |

|                                                    |     |                                                                                                                                                                                              |        |
|----------------------------------------------------|-----|----------------------------------------------------------------------------------------------------------------------------------------------------------------------------------------------|--------|
| Blinding (masking)                                 | 17a | Who will be blinded after assignment to interventions and how                                                                                                                                | 7      |
|                                                    | 17b | If blinded, circumstances under which unblinding is permissible and procedure for revealing a participant's allocated intervention during the trial                                          | NA     |
| Methods: Data collection, management, and analysis |     |                                                                                                                                                                                              |        |
| Data collection methods                            | 18a | Plans for assessment and collection of outcome, baseline, and other trial data, including any related processes to promote data quality along with their reliability and validity, if known. | 7-10   |
|                                                    | 18b | Plans to promote participant retention and complete follow-up, including list of any outcome data to be collected for participants who discontinue or deviate from intervention protocols    | 7-10   |
| Data management                                    | 19  |                                                                                                                                                                                              | 12     |
| Statistical methods                                | 20a | Statistical methods for analysing primary and secondary outcomes. Reference to where other details of the statistical analysis plan can be found, if not in the protocol                     | 15     |
|                                                    | 20b | Methods for any additional analyses                                                                                                                                                          | 15     |
|                                                    | 20c | Definition of analysis population relating to protocol non-adherence and any statistical methods to handle missing data                                                                      | 15     |
| Methods: Monitoring                                |     |                                                                                                                                                                                              |        |
| Data monitoring                                    | 21a | Composition of data monitoring committee (DMC)                                                                                                                                               | 17     |
|                                                    | 21b | Description of any interim analyses and stopping guidelines                                                                                                                                  | 15, 16 |
| Harms                                              | 22  |                                                                                                                                                                                              | 17     |
| Auditing                                           | 23  |                                                                                                                                                                                              | 16     |
| Ethics and dissemination                           |     |                                                                                                                                                                                              |        |
| Research ethics approval                           | 24  |                                                                                                                                                                                              | 16     |
| Protocol amendments                                | 25  |                                                                                                                                                                                              | NA     |
| Consent or assent                                  | 26a | Who will obtain informed consent or assent from potential trial participants or authorised surrogates, and how                                                                               | 16     |
|                                                    | 26b | Additional consent provisions for collection and use of participant data and biological specimens in ancillary studies, if applicable                                                        | NA     |
| Confidentiality                                    | 27  |                                                                                                                                                                                              | 13, 16 |
| Declaration of interests                           | 28  |                                                                                                                                                                                              | 17     |
| Access to data                                     | 29  |                                                                                                                                                                                              | 17     |
| Ancillary and post-trial care                      | 30  |                                                                                                                                                                                              | 13-14  |
| Dissemination policy                               | 31a | Plans for investigators and sponsor to communicate trial results to participants, healthcare professionals, the public, and other relevant groups including any publication restrictions     | 18     |
|                                                    | 31b | Authorship eligibility guidelines and any intended use of professional writers                                                                                                               | NA     |

|                            |     |                                                                                                                 |    |
|----------------------------|-----|-----------------------------------------------------------------------------------------------------------------|----|
|                            | 31c | Plans, if any, for granting public access to the full protocol, participant-level dataset, and statistical code | 16 |
| Appendices                 |     |                                                                                                                 |    |
| Informed consent materials | 32  |                                                                                                                 | NA |
| Biological specimens       | 33  |                                                                                                                 | NA |
